# Supplementary material for: Vertical profiling of aerosol hygroscopic properties in the planetary boundary layer during the PEGASOS campaigns
Source: Copernicus journal article supplement (doi:10.5194/acp-16-7295-2016), 2016-06-10
Supplement: Supplementary file 1 [file acp-16-7295-2016-supplement.pdf]

Supplement of Atmos. Chem. Phys., 16, 7295–7315, 2016  
<http://www.atmos-chem-phys.net/16/7295/2016/>  
doi:10.5194/acp-16-7295-2016-supplement  
© Author(s) 2016. CC Attribution 3.0 License.

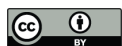

Atmospheric  
Chemistry  
and Physics  
Open Access  
EGU

*Supplement of*

## **Vertical profiling of aerosol hygroscopic properties in the planetary boundary layer during the PEGASOS campaigns**

**Bernadette Rosati et al.**

*Correspondence to:* Martin Gysel ([martin.gysel@psi.ch](mailto:martin.gysel@psi.ch))

The copyright of individual parts of the supplement might differ from the CC-BY 3.0 licence.

**Effective indices of refraction during the PEGASOS study:**

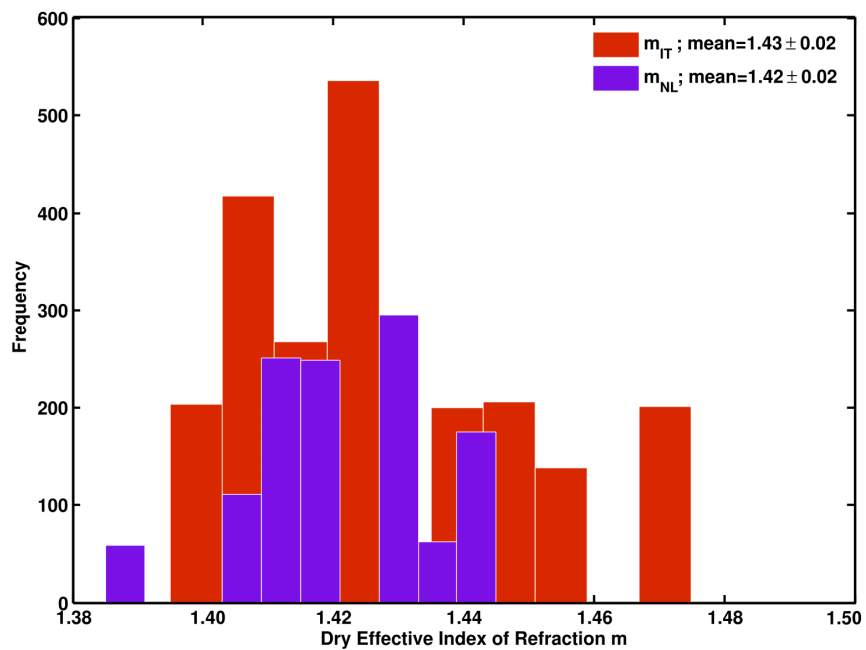

**Figure S1.** Histogram of the temporal variability of the dry effective indices of refraction ( $m$ ), observed during the flights on 20 June 2012 in the Po Valley, Italy, ( $m_{IT}$ , dark red bars) and 24 May 2012 close to Cabauw, Netherlands, ( $m_{NL}$ , violet bars). Only the results for size-selected particles with a dry mobility diameter of 500 nm are presented. On average, effective indices of refraction of  $1.43 \pm 0.02$  (mean  $\pm$  SD) and  $1.42 \pm 0.02$  were found in Italy and the Netherlands, respectively. However, an absolute uncertainty of  $\pm 0.04$  has to be attributed to all index of refraction retrievals (see Rosati et al., 2015a).

**Meteorological parameters measured during the flight on 20 June 2012 in the Po Valley, Italy:**

**Supplement Table 1.** Mean potential temperature ( $\Theta$ ) and relative humidity (RH) during IHP1/2 and IHP5/6 with respective standard deviations representing the temporal variability. Results are presented for two different altitudes, 100 m and 700 m AGL. Measurements of the temperature (Pt100-Sensor; OMEGA; 15s time respond), RH (HMP45-Sensor; Vaisala; 15s time respond), height above ground, wind-speed and direction (all three retrieved by measurement of the pressure using sensors #239 and #270; Setra) were continuously recorded on board the airship. All of these measurements were logged with a 100 Hz frequency and finally averaged over 10 data points.

| <i>Profile</i> | <i>Altitude</i> | <i>Layer</i>       | <i>Zeppelin</i><br>$\Theta$ [ $^{\circ}\text{C}$ ] | <i>Zeppelin</i><br>RH [%] |
|----------------|-----------------|--------------------|----------------------------------------------------|---------------------------|
| IHP1/2         | 100 m           | New ML             | 26.0 ( $\pm 0.6$ )                                 | 60.1 ( $\pm 2.0$ )        |
|                | 700 m           | RL                 | 33.0 ( $\pm 0.9$ )                                 | 39.4 ( $\pm 3.1$ )        |
| IHP5/6         | 100 m           | Fully developed ML | 33.4 ( $\pm 0.6$ )                                 | 31.5 ( $\pm 3.1$ )        |
|                | 700 m           | Fully developed ML | 33.6 ( $\pm 0.5$ )                                 | 36.5 ( $\pm 4.2$ )        |

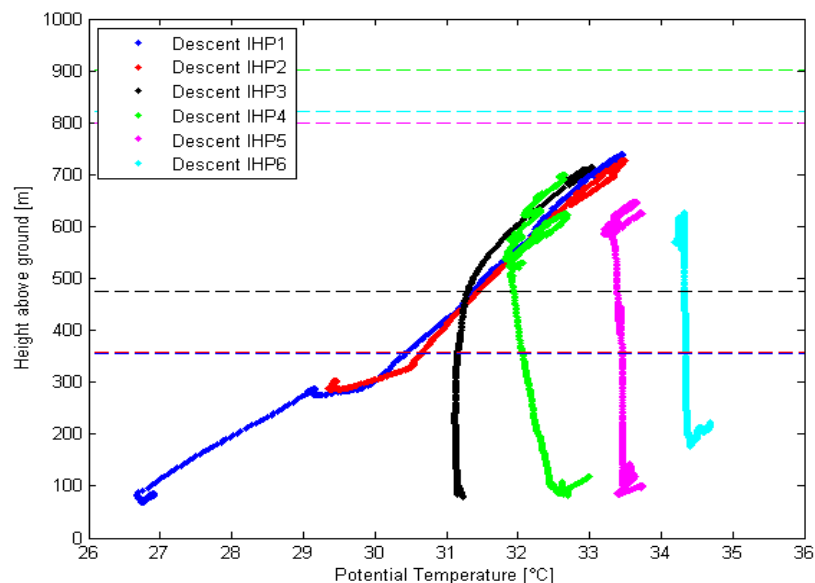

**Figure S2:** Height profiles of the potential temperature ( $\Theta$ ) measured aboard the Zeppelin NT during the flight on 20 June 2012, in Italy. Each color represents the descents of height profiles 1-6 (IHP1-6), respectively. The horizontal lines depict the estimated mixed layer height (MLH) from the ceilometer retrieval during the six height profiles. A clear vertical structure of  $\Theta$  is visible for the first two profiles, while the last four show very little or no altitude dependence at all. This indicates that the sub-layers in the PBL were still separated at the beginning of the flight and that a fully mixed layer was probed at the end. The estimated MLH retrieved from the ceilometer shows comparable results with a low MLH of approximately 350 m above ground in the morning that evolves to over 800 m above ground later during the day.
